# Supplementary material for: The impact of behaviour change communication on the use of insecticide treated nets: a secondary analysis of ten post-campaign surveys from Nigeria
Source: PubMed Central journal article supplement (PMC4992294; doi:10.1186/s12936-016-1463-7), 2016-08-19
Supplement: 12936_2016_1463_MOESM5_ESM.pdf [file 12936_2016_1463_MOESM5_ESM.pdf]

**Additional file 5**

**Results from regression analysis on action score, discussion of net use and intention to use net**

**Table 8:** Multi-variable linear regression of action score

| Explanatory variable                   | Outcome: action score |              |         |
|----------------------------------------|-----------------------|--------------|---------|
|                                        | Coefficient*          | 95% CI       | p-value |
| Number of messages recalled            |                       |              |         |
| 0                                      | ref.                  | --           | --      |
| 1                                      | 0.01                  | -0.06, 0.07  | 0.87    |
| 2                                      | 0.11                  | 0.03, 0.18   | 0.004   |
| 3                                      | 0.14                  | 0.06, 0.23   | 0.001   |
| 4                                      | 0.25                  | 0.12, 0.38   | <0.001  |
| 5                                      | 0.30                  | 0.12, 0.49   | 0.001   |
| Time since campaign                    |                       |              |         |
| 0-3 months                             | ref.                  | --           | --      |
| 3-6 months                             | 0.11                  | -0.03, 0.26  | 0.12    |
| 6-9 months                             | 0.36                  | 0.17, 0.55   | <0.001  |
| 9-16 months                            | 0.34                  | 0.13, 0.55   | 0.002   |
| Season                                 |                       |              |         |
| Dry                                    | ref.                  | --           | --      |
| Mid-rain                               | 0.48                  | 0.38, 0.58   | <0.001  |
| Late rain                              | -0.12                 | -0.26, 0.02  | 0.096   |
| Wealth quintiles                       |                       |              |         |
| Poorest                                | ref.                  | --           | --      |
| Second                                 | 0.06                  | -0.01, 0.12  | 0.11    |
| Third                                  | 0.04                  | -0.04, 0.12  | 0.31    |
| Fourth                                 | 0.08                  | 0.00, 0.16   | 0.068   |
| Wealthiest                             | 0.08                  | -0.01, 0.16  | 0.084   |
| Education of head                      |                       |              |         |
| Non-literate                           | ref.                  | --           | --      |
| Primary                                | 0.04                  | -0.02, 0.10  | 0.17    |
| Secondary                              | 0.16                  | 0.10, 0.22   | <0.001  |
| Tertiary and higher                    | 0.18                  | 0.09, 0.26   | <0.001  |
| Age of head in years                   |                       |              |         |
| 19-29                                  | ref.                  | --           | --      |
| 30-59                                  | -0.06                 | -0.12, -0.01 | 0.047   |
| 60+                                    | -0.14                 | -0.23, -0.05 | 0.002   |
| HH owns any mosquito net               | 0.17                  | 0.10, 0.24   | <0.001  |
| HH with 3 or less people & no children | -0.09                 | -0.16, -0.04 | 0.001   |
| North vs. South                        | 0.40                  | 0.32, 0.49   | <0.001  |
| 2009 vs. 2010-12                       | 0.84                  | 0.66, 1.04   | <0.001  |

\* describes the change in mean action score induced by covariate

**Table 10:** Multi-variable logistic regression of discussing net use and intent to use nets

| Explanatory variable*                  | Outcome 1: discuss net use |           |         | Outcome 2: intent to use net every night |          |         |
|----------------------------------------|----------------------------|-----------|---------|------------------------------------------|----------|---------|
|                                        | OR                         | 95% CI    | p-value | OR                                       | 95% CI   | p-value |
| BCC messages recalled                  |                            |           |         |                                          |          |         |
| 0                                      | 1.00                       | --        | --      | 1.00                                     | --       | --      |
| 1                                      | 3.36                       | 2.7, 4.2  | <0.001  | 1.34                                     | 0.9, 2.0 | 0.13    |
| 2                                      | 4.04                       | 3.1, 5.3  | <0.001  | 1.36                                     | 1.0, 1.8 | 0.033   |
| 3                                      | 5.14                       | 3.7, 7.2  | <0.001  | 1.63                                     | 1.2, 2.3 | 0.004   |
| 4                                      | 7.65                       | 3.7, 15.9 | <0.001  | 1.05                                     | 0.6, 1.8 | 0.85    |
| 5                                      | 10.09                      | 3.6, 28.1 | <0.001  | 0.92                                     | 0.5, 1.7 | 0.78    |
| Confidence to take action              |                            |           |         |                                          |          |         |
| Poor                                   | 1.00                       | --        | --      | 1.00                                     | --       | --      |
| Good                                   | 2.36                       | 1.8, 3.1  | <0.001  | 1.38                                     | 1.0, 1.9 | 0.043   |
| Very good                              | 3.21                       | 2.4 4.3   | <0.001  | 1.79                                     | 1.3, 2.4 | <0.001  |
| Excellent                              | 4.00                       | 3.0, 5.3  | <0.001  | 4.36                                     | 3.2, 5.9 | <0.001  |
| Net ownership                          |                            |           |         |                                          |          |         |
| No net                                 | 1.00                       | --        | --      | 1.00                                     | --       | --      |
| Net but not from campaign              | 4.76                       | 3.4, 6.7  | <0.001  | 1.69                                     | 1.0, 2.8 | 0.038   |
| Campaign net                           | 7.33                       | 5.8, 9.3  | <0.001  | 2.14                                     | 1.6, 2.8 | <0.001  |
| Season                                 |                            |           |         |                                          |          |         |
| Dry                                    | 1.00                       | --        | --      | 1.00                                     | --       | --      |
| Mid-rain                               | 1.65                       | 1.3, 2.2  | <0.001  | 4.79                                     | 3.7, 6.2 | <0.001  |
| Late-rain                              | 1.21                       | 0.9, 1.6  | 0.16    | 3.98                                     | 3.0, 5.3 | <0.001  |
| Region                                 |                            |           |         |                                          |          |         |
| North vs. South                        | 1.65                       | 1.3, 2.1  | <0.001  | 1.45                                     | 1.1, 1.9 | <0.001  |
| Residence                              |                            |           |         |                                          |          |         |
| Urban vs rural                         | 1.07                       | 0.9, 1.3  | 0.54    | 0.69                                     | 0.5, 0.9 | 0.008   |
| Age of head of household               |                            |           |         |                                          |          |         |
| Age 19-29 vs. 30+                      | 0.75                       | 0.6, 0.9  | 0.003   | 1.04                                     | 0.9, 1.3 | 0.66    |
| Education of head of household         |                            |           |         |                                          |          |         |
| Non-literate vs primary or higher      | 0.80                       | 0.7, 0.9  | 0.011   | 0.70                                     | 0.6, 0.8 | <0.001  |
| Household size                         |                            |           |         |                                          |          |         |
| HH with 3 or less people & no children | 0.73                       | 0.6, 0.9  | 0.001   | 0.96                                     | 0.8, 1.1 | 0.61    |

\*The variables time since campaign and year were included in models to adjust for differences in surveys
