# Supplementary material for: The impact of behaviour change communication on the use of insecticide treated nets: a secondary analysis of ten post-campaign surveys from Nigeria
Source: Malar J. 2016 Aug 19;15:422. doi: 10.1186/s12936-016-1463-7 (PMC4992294; doi:10.1186/s12936-016-1463-7)
Supplement: Supplementary file 3 — 10.1186/s12936-016-1463-7 Sources of information by channel and sub-categories. Table of proportions of all households and those exposed to any message that reported hearing information on nets from specific channels. [file 12936_2016_1463_MOESM3_ESM.pdf]

### Additional file 3

#### Sources of information by channel and sub-categories

**Table 7:** Sources of information by major and sub-categories (multiple responses possible)

| Information Source    | All Households            | If any Information        |
|-----------------------|---------------------------|---------------------------|
|                       | % (95% CI)                | % (95% CI)                |
| <b>Campaign</b>       | <b>19.7% (18.0, 21.5)</b> | <b>33.7% (30.9, 36.6)</b> |
| Leaflet               | 14.6% (13.1, 16.3)        | 25.0% (22.5, 27.8)        |
| Team                  | 6.2% ( 5.2, 7.3)          | 10.6% ( 9.0, 12.5)        |
| Distribution Point    | 0.1% ( 0.0, 0.2)          | 0.1% ( 0.0, 0.3)          |
| <b>Media</b>          | <b>21.5% (19.7, 23.5)</b> | <b>36.8% (33.9, 39.8)</b> |
| Radio                 | 16.4% (14.7, 18.1)        | 28.0% (25.4, 30.7)        |
| Drama                 | 5.9% ( 4.8, 7.3)          | 10.1% ( 8.1, 12.5)        |
| Press                 | 0.1% ( 0.1, 0.2)          | 0.2% ( 0.1, 0.4)          |
| <b>Mediators</b>      | <b>15.7% (14.1, 17.4)</b> | <b>26.8% (24.4, 29.4)</b> |
| Leaders               | 9.6% ( 8.5, 11.0)         | 16.5% (14.5, 18.6)        |
| Town announcer        | 6.3% ( 5.4, 7.5)          | 10.9% ( 9.3, 12.8)        |
| Faith based           | 1.9% ( 1.5, 2.4)          | 3.2% ( 2.5, 4.1)          |
| <b>Health System</b>  |                           |                           |
| Health worker         | <b>18.6% (16.9, 20.5)</b> | <b>31.9% (29.2, 34.7)</b> |
| <b>Social network</b> |                           |                           |
| Family or friends     | <b>14.8% (13.3, 16.5)</b> | <b>25.4% (23.0, 28.0)</b> |
